# Supplementary material
Source: Springer Nature journal article supplement (https://www.springermedizin.de/resource/supplementary/12889_2010_2490_MOESM2_ESM.pdf/9486092)

### ROC Curves for Comparisons

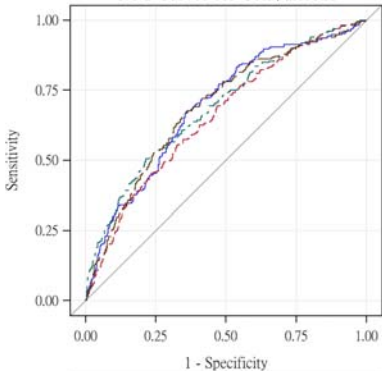

ROC Curve (Area)

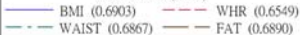

Supplement: MOESM2 [file 9486092]
